# Supplementary figures and images for: 2D 4.82 Network with threefold parallel interpenetration from nanometer-sized tripodal ligand and lead(ii) nitrateElectronic supplementary information available: Fig. 1S. See http://www.rsc.org/suppdata/cc/b2/b207568g/
Source: Royal Society of Chemistry journal article supplement (doi:10.1039/b207568g), 2002-10-03

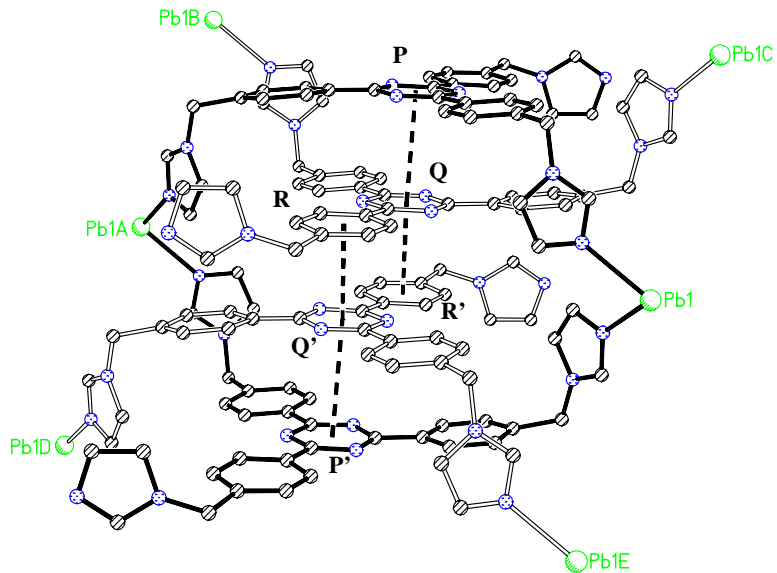

Fig. S1

Supplement: b207568g.pdf [file b207568g.pdf]
